# Supplementary material for: Cholesterol-Modified Anti-Il6 siRNA Reduces the Severity of Acute Lung Injury in Mice
Source: MDPI journal article supplement (doi:10.3390/cells13090767), 2024-04-30
Supplement: s1 [file s1]

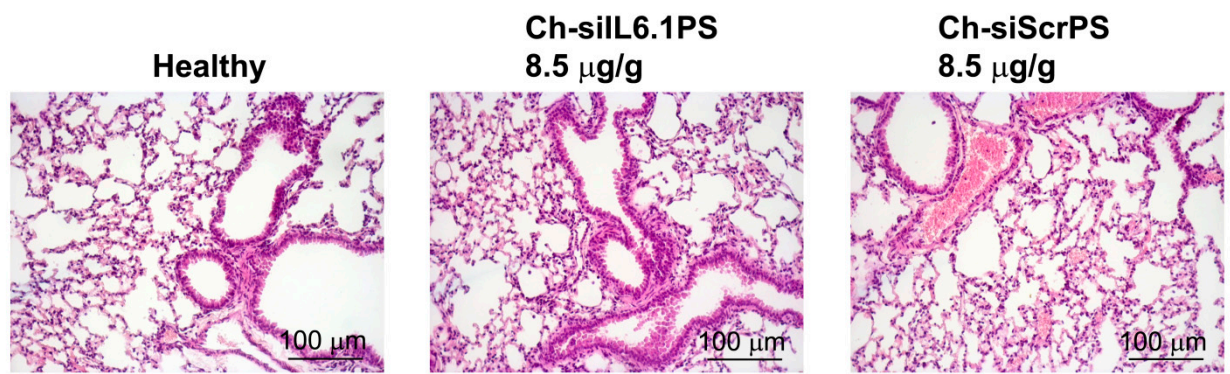

**Figure S1.** Representative histological images of lung tissue from healthy mice without treatment and after Ch-siIL6.1PS or Ch-siScrPS administration. Hematoxylin and eosin staining. Original magnification  $\times 200$ .
